# Supplementary material for: Improvement of In Vivo Fluorescence Tools for Fast Monitoring of Freshwater Phytoplankton and Potentially Harmful Cyanobacteria
Source: MDPI journal article supplement (doi:10.3390/ijerph192114075), 2022-10-28
Supplement: s1 [file s1]

## Supplementary Materials:

# Improvement of *In Vivo* Fluorescence Tools for Fast Monitoring of Freshwater Phytoplankton and Potentially Harmful Cyanobacteria

Mara Simonazzi <sup>1,\*</sup>, Laura Pezzolesi <sup>1,2,\*</sup>, Franca Guerrini <sup>1</sup>, Silvana Vanucci <sup>3</sup>, Giancarlo Graziani <sup>4</sup>, Ivo Vasumini <sup>4</sup>, Andrea Pandolfi <sup>4</sup>, Irene Servadei <sup>5</sup> and Rossella Pistocchi <sup>1,2</sup>

<sup>1</sup> Department of Biological, Geological and Environmental Sciences (BiGeA), University of Bologna, Via S'Alberto 163, 48123 Ravenna, Italy

<sup>2</sup> Interdepartmental Centre for Industrial Research in Renewable Resources, Environment, Sea and Energy (CIRI-FRAME), University of Bologna, Via S'Alberto 163, 48123 Ravenna, Italy

<sup>3</sup> Department of Chemical, Biological, Pharmaceutical and Environmental Sciences (ChiBioFarAm), University of Messina, Viale Ferdinando d'Alcontres 31, 98166 Messina, Italy

<sup>4</sup> Romagna Acque Società delle Fonti S.p.a., Piazza Orsi Mangelli 10, 47122 Forlì, Italy

<sup>5</sup> Fondazione Centro Ricerche Marine, Viale A. Vespucci, 2, 47042 Cesenatico, Italy

\* Correspondence: mara.simonazzi2@unibo.it (M.S.); laura.pezzolesi@unibo.it (L.P.); Tel.: +39-0544-937373 (M.S. & L.P.)

a

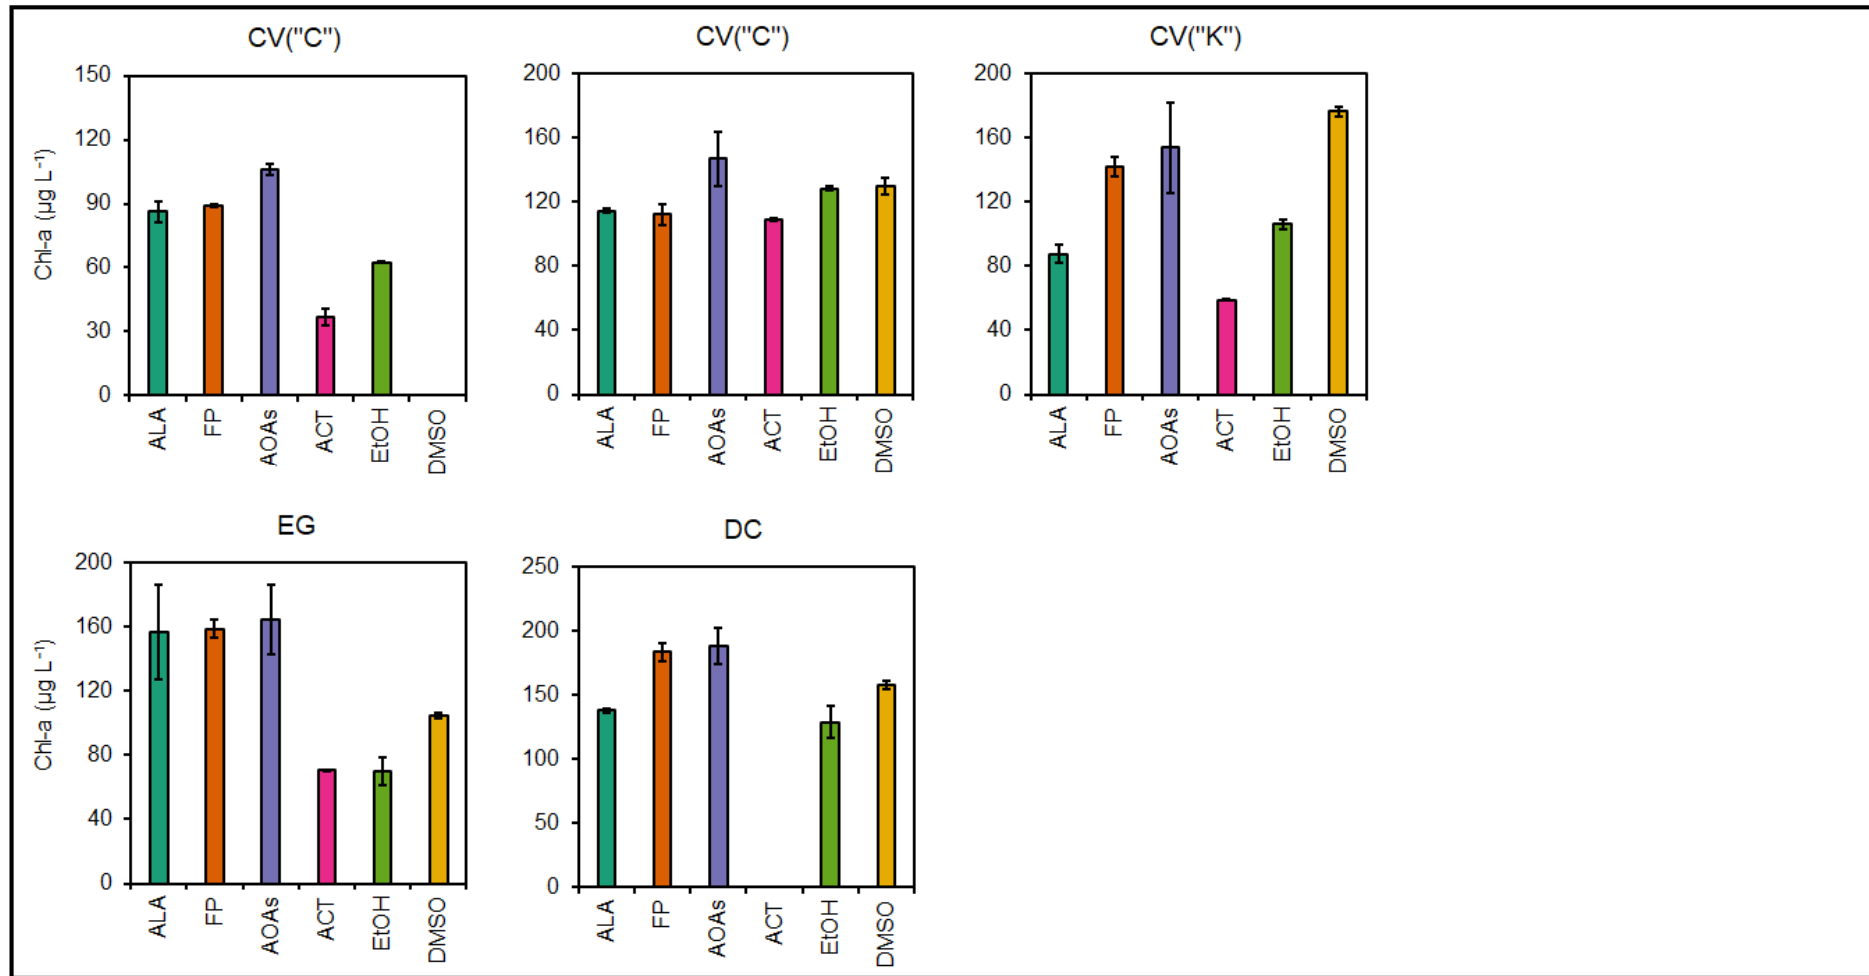

b

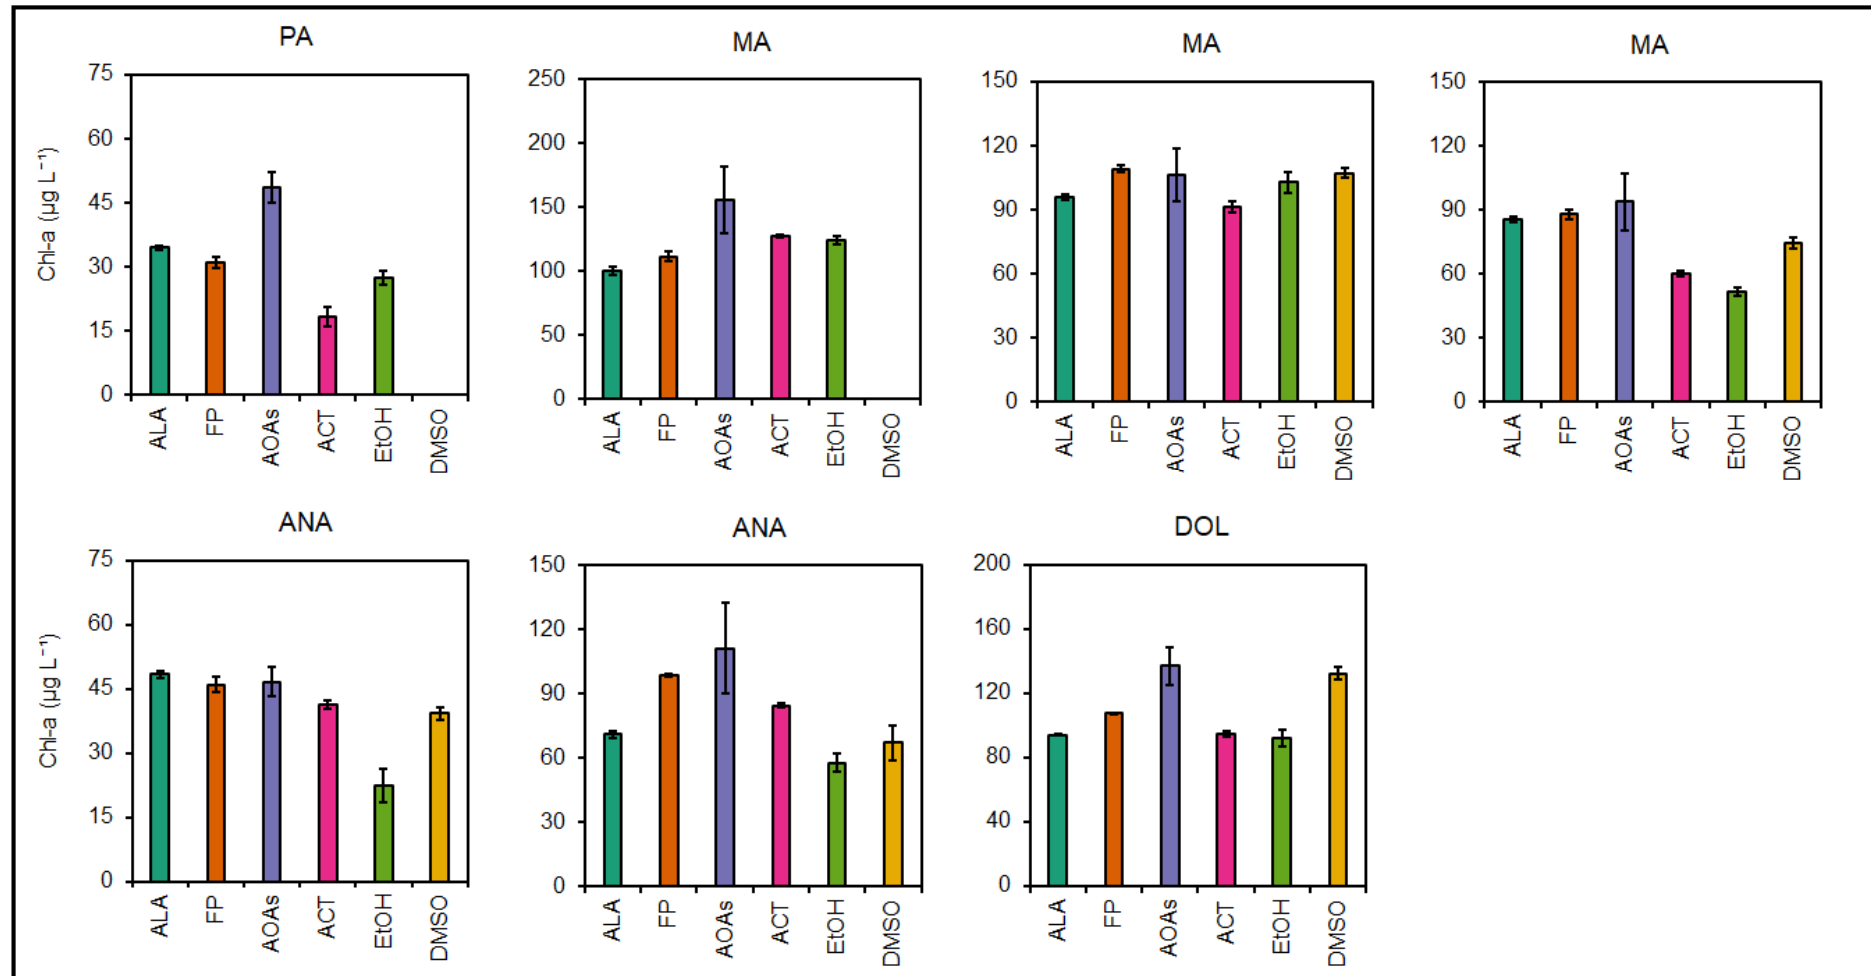

C

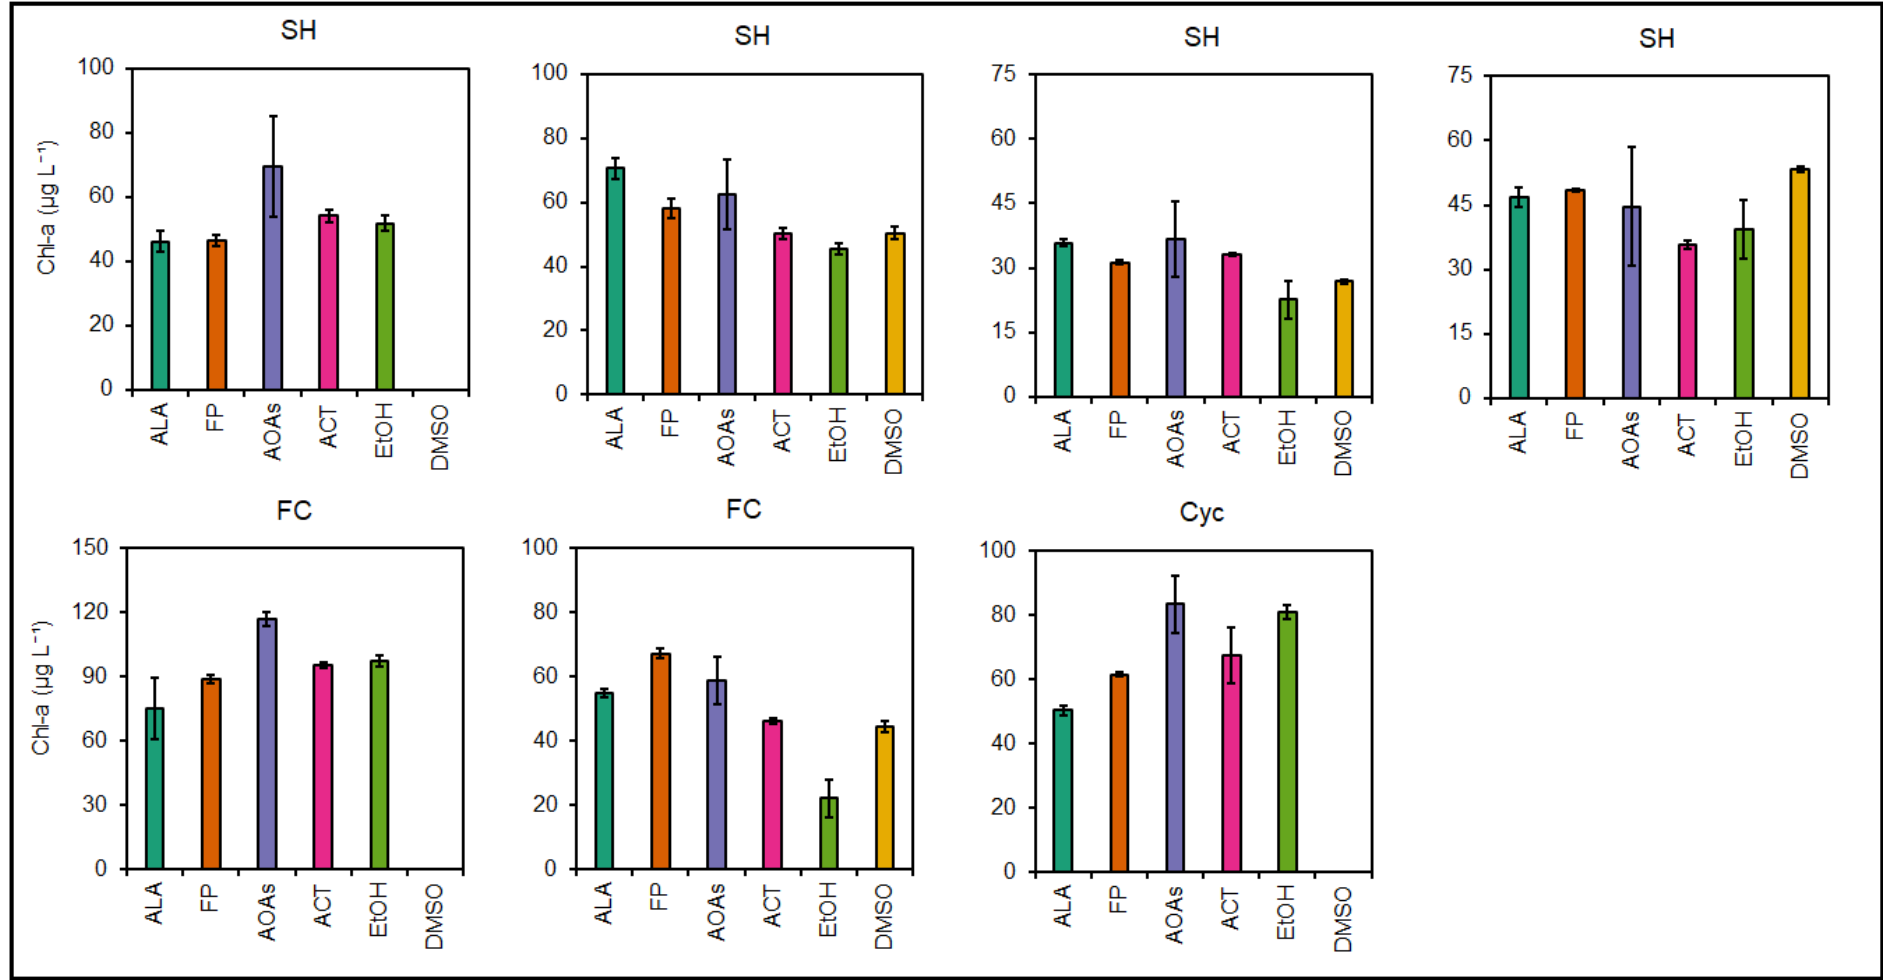

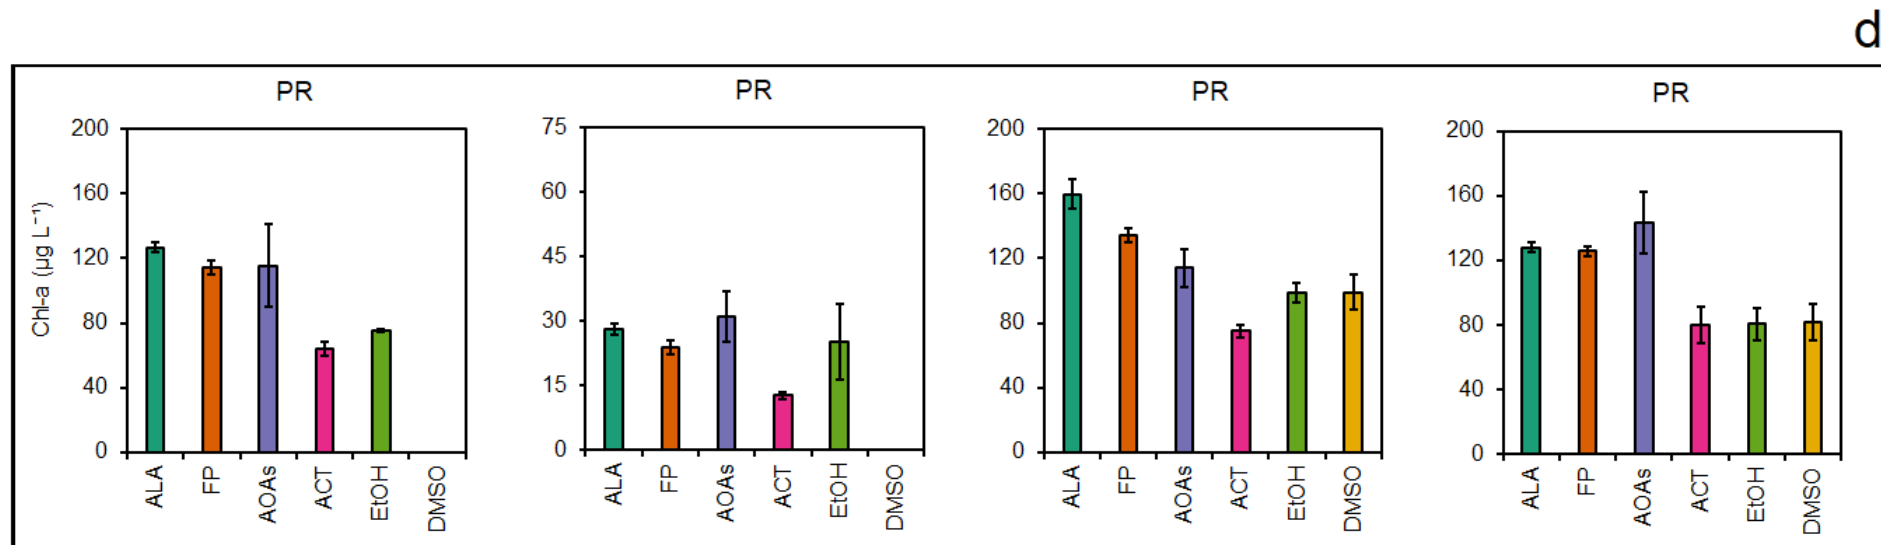

**Figure S1.** Chl-a concentration ( $\mu\text{g L}^{-1}$ ) obtained for each sample with the three models of spectrofluorometers (i.e. ALA, FP, AOAs) and the three solvent extractions methods (i.e. ACT, EtOH, DMSO). (a) “Green” group, CV(“C”) = *Chlorella vulgaris* (CCAP strain), CV(“K”) = *Chlorella vulgaris* (NIVA-CCA strain), EG = *Euglena gracilis*, DC = *Desmodesmus communis*, (b) Cyanobacteria, PA = *Planktothrix agardhii*, MA = *Microcystis aeruginosa*, DOL = *Dolichospermum* sp., ANA = *Anabaena* sp., (c) “Brown” group, SH = *Stephanodiscus hantzschii*, Cyc = *Cyclotella* sp., FC = *Fragilaria crotonensis*, and (d) “Red” group, PR = *Planktothrix rubescens*.

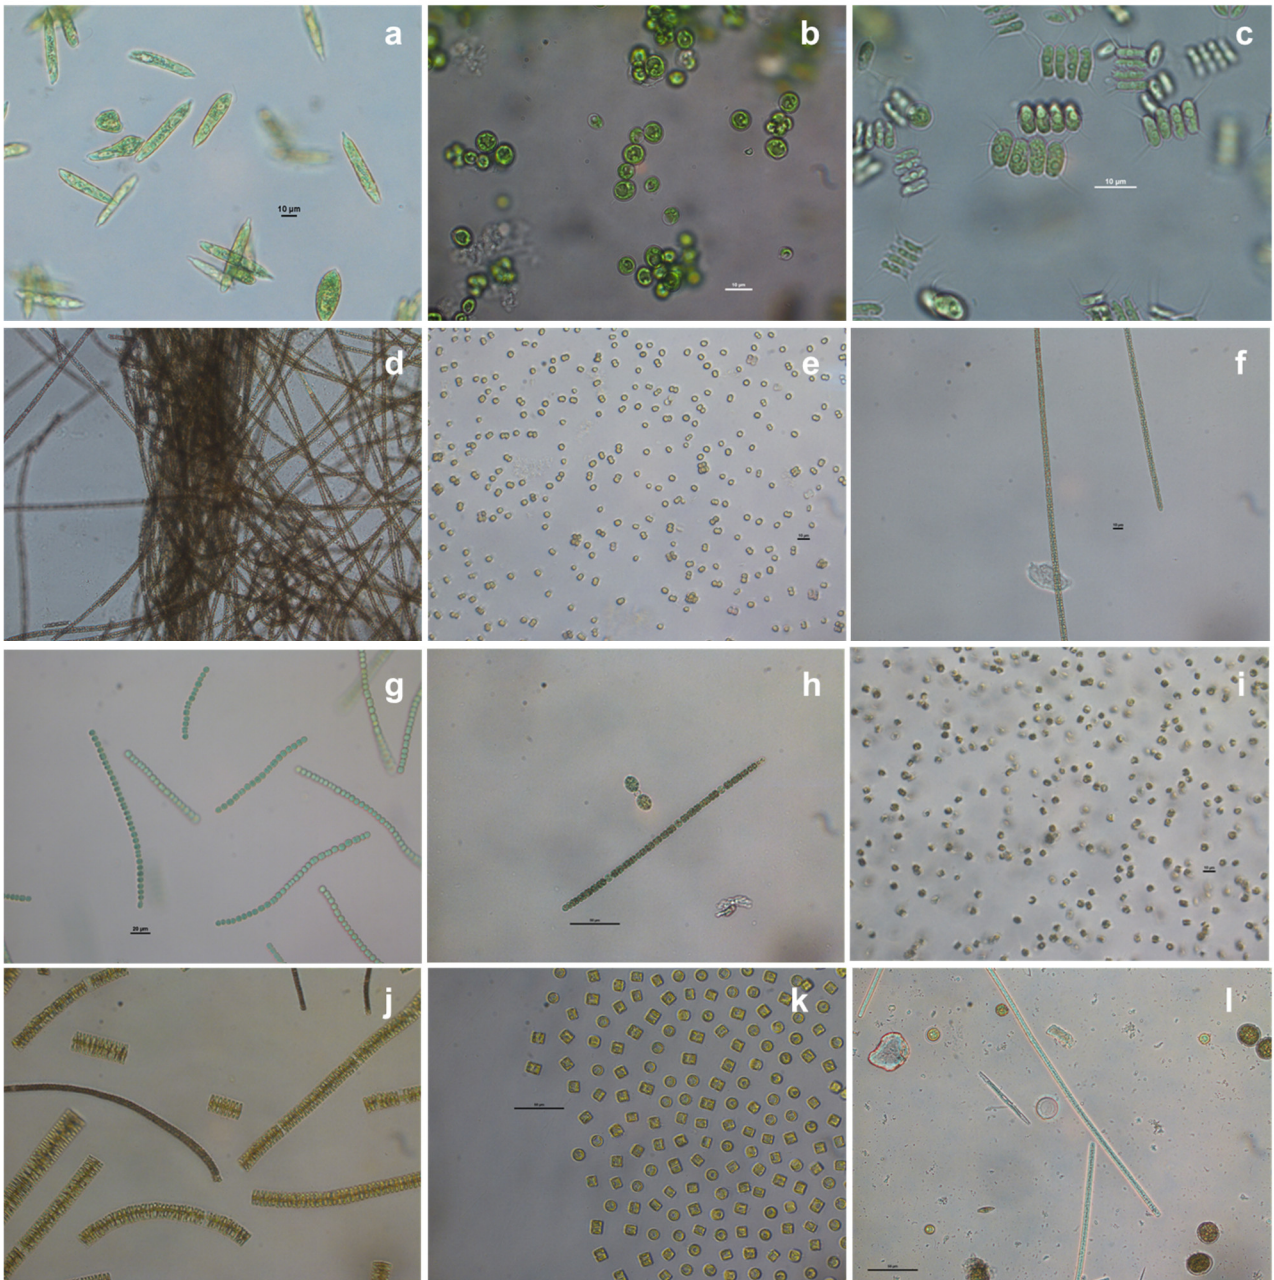

**Figure S2.** Microscopic photographs of the algae and cyanobacteria employed in the study. (a) *Euglena gracilis*; (b) *Chlorella vulgaris*; (c) *Desmodesmus communis*; (d) *Planktothrix rubescens*; (e) *Microcystis aeruginosa*; (f) *Planktothrix agardhii*; (g) cf. *Anabaena* sp.; (h) cf. *Dolichospermum* sp.; (i) *Stephanodiscus hantzschii*; (j) *Fragilaria crotonensis*; (k) cf. *Cyclotella* sp.; (l) natural freshwater sample from Reno river (Emilia-Romagna, Italy). All images were taken using a magnification of 320x, except for (e) and (i) (magnification 400x), and (b) and (c) (magnification 1000x).

**Table S1.** List and specifications of spectrofluorometers employed in this study. Lab1-5 were the distinct laboratories employing the spectrofluorometric probes. ALA = AlgaeLabAnalyser, FP = FluoroProbe, AOA = AlgaeOnlineAnalyser (4 distinct probes with the same specifications), AT = AlgaeTorch.

| Laboratory | Probe | Number of LEDs | Emission (nm) | Excitation (nm)                   | Chl-a range ( $\mu\text{g L}^{-1}$ ) | Resolution ( $\mu\text{g L}^{-1}$ ) |
|------------|-------|----------------|---------------|-----------------------------------|--------------------------------------|-------------------------------------|
| Lab1       | ALA   | 6              | 680           | 370 – 470 – 525 – 570 – 590 – 610 | 0 – 200                              | 0.01                                |
| Lab2       | FP    | 6              | 680           | 370 – 470 – 525 – 570 – 590 – 610 | 0 – 200                              | 0.01                                |
| Lab2       | AOA1  | 6              | 680           | 370 – 470 – 525 – 570 – 590 – 610 | 0 – 200                              | 0.01                                |
| Lab3       | AOA2  | 6              | 680           | 370 – 470 – 525 – 570 – 590 – 610 | 0 – 200                              | 0.01                                |
| Lab4       | AOA3  | 6              | 680           | 370 – 470 – 525 – 570 – 590 – 610 | 0 – 200                              | 0.01                                |
| Lab5       | AOA4  | 6              | 680           | 370 – 470 – 525 – 570 – 590 – 610 | 0 – 200                              | 0.01                                |
| Lab1       | AT    | 7              | 680           | 470 – 525 – 570 – 610             | 0 – 200                              | 0.1                                 |

**Table S2.** Qualitative and quantitative analysis and biovolume of phytoplankton and Cyanobacteria in the natural freshwater sample. Total phytoplankton count is reported as cell L<sup>-1</sup>, while for cyanobacterial filaments numbers are expressed as cell-per-filaments L<sup>-1</sup> or filaments L<sup>-1</sup>

| Algal group (based on probes) | Class             | Order             | Family             | Alga                           | cell L <sup>-1</sup> | filaments L <sup>-1</sup> | mm <sup>3</sup> L <sup>-1</sup> |
|-------------------------------|-------------------|-------------------|--------------------|--------------------------------|----------------------|---------------------------|---------------------------------|
| “Green”                       | Chlorophyceae     | Chlamydomonadales | Chlamydomonadaceae | <i>Chlamydomonas</i> sp.       | 5.72×10 <sup>6</sup> | —                         | 2.994                           |
|                               | Chlorophyceae     | Sphaeropleales    | Scenedesmaceae     | <i>Scenedesmus</i> spp.        | 1.25×10 <sup>5</sup> | —                         | 0.011                           |
|                               | Chlorophyceae     | Sphaeropleales    | Scenedesmaceae     | <i>Coelastrum</i> sp.          | 7.90×10 <sup>4</sup> | —                         | 0.006                           |
|                               | Chlorophyceae     | Sphaeropleales    | Hydrodictyaceae    | <i>Tetradron</i> sp.           | 9.12×10 <sup>3</sup> | —                         | 0.001                           |
|                               | Chlorophyceae     | Sphaeropleales    | Hydrodictyaceae    | <i>Pediastrum</i> sp.          | 9.73×10 <sup>4</sup> | —                         | 0.020                           |
|                               | Chlorophyceae     | Sphaeropleales    | Selenastraceae     | <i>Monoraphidium</i> sp.       | 8.51×10 <sup>4</sup> | —                         | 0.004                           |
|                               | Zygnematomyceae   | Desmidiaceae      | Desmidiaceae       | <i>Staurastrum</i> sp.         | 6.08×10 <sup>3</sup> | —                         | 0.005                           |
|                               | Trebouxiophyceae  | Chlorellales      | Oocystaceae        | <i>Willea</i> sp.              | 9.73×10 <sup>4</sup> | —                         | 0.007                           |
|                               | Xanthophyceae     | Tribonematales    | Tribonemataceae    | <i>Tribonema</i> sp.           | 9.30×10 <sup>5</sup> | —                         | 0.622                           |
| Cyanobacteria                 | Cyanophyceae      | Chroococcales     | Chroococcaceae     | <i>Chroococcus</i> sp.         | 7.30×10 <sup>4</sup> | —                         | 0.002                           |
|                               | Cyanophyceae      | Synechococcales   | Merismopediaceae   | <i>Merismopedia</i> sp.        | 1.34×10 <sup>5</sup> | —                         | 0.001                           |
|                               | Cyanophyceae      | Oscillatoriales   | Microcoleaceae     | cf. <i>Planktothrix</i> sp.    | 5.04×10 <sup>7</sup> | 6.60×10 <sup>5</sup>      | 1.175                           |
|                               | Cyanophyceae      | Nostocales        | Aphanizomenonaceae | <i>Dolichospermum</i> sp.      | 3.89×10 <sup>5</sup> | 1.52×10 <sup>4</sup>      | 0.025                           |
|                               | Cyanophyceae      | Nostocales        | Aphanizomenonaceae | <i>Cuspidothrix</i> sp.        | 2.62×10 <sup>6</sup> | 6.69×10 <sup>4</sup>      | 0.093                           |
|                               | Cyanophyceae      | Nostocales        | Aphanizomenonaceae | <i>Raphidiopsis</i> sp.        | 1.43×10 <sup>7</sup> | 1.37×10 <sup>5</sup>      | 0.505                           |
|                               | Cyanophyceae      | —                 | —                  | filaments (< 1 µm)             | 5.16×10 <sup>7</sup> | 2.10×10 <sup>5</sup>      | 0.825                           |
| “Brown”                       | Mediophyceae      | Stephanodiscales  | Stephanodiscaceae  | <i>Cyclotella</i> sp.          | 5.47×10 <sup>4</sup> | —                         | 0.036                           |
|                               | Bacillariophyceae | Bacillariales     | Bacillariaceae     | <i>Nitzschia</i> spp. (< 5 µm) | 3.50×10 <sup>5</sup> | —                         | 0.006                           |
|                               | Dinophyceae       | Peridinales       | —                  | Peridinales indet.             | 1.52×10 <sup>4</sup> | —                         | 0.031                           |
| “Red”                         | Cryptophyceae     | Cryptomonadales   | —                  | Cryptomonadales indet.         | 1.03×10 <sup>5</sup> | —                         | 0.019                           |
| Other                         | Other             | —                 | —                  | Other (< 20 µm)                | 5.78×10 <sup>4</sup> | —                         | 0.003                           |
| TOTAL                         |                   |                   |                    |                                | 1.27×10 <sup>8</sup> | 9.02×10 <sup>6</sup>      | 6.392                           |



**Table S3.** Values of Student's  $t$  from two-tailed goodness-of-fit test (confidence level 99.9%,  $p < 0.001$ ). Values were calculated comparing expected microscopic measurements (i.e. cell counting, cell and filaments counting, biovolume) to observed fluorometric outputs, based on algal group assignment (percentage on total) in the field freshwater sample. Percentage of Chl-a or microscopic measurements attributed to “green” group (%green/tot), Cyanobacteria (%cyano/tot), “brown” group (%brown/tot) and *P. rubescens* (%P.rub/tot). Significant  $t$ -values are reported in bold.

| Algal group | Microscopic measurement         | ALA            | FP             | AOA1           | AOA2           | AOA3           | AOA4           | AT             | Fluo          |
|-------------|---------------------------------|----------------|----------------|----------------|----------------|----------------|----------------|----------------|---------------|
| %green/tot  | cell L <sup>-1</sup>            | <b>62.85</b>   | 31.32          | <b>573.12</b>  | <b>941.68</b>  | <b>178.42</b>  | <b>114.27</b>  | n.d.           | <b>25.03</b>  |
|             | cell+fil L <sup>-1</sup>        | -8.80          | -20.35         | <b>-48.63</b>  | <b>-218.84</b> | <b>-104.08</b> | -9.65          | n.d.           | <b>-6.45</b>  |
|             | mm <sup>3</sup> L <sup>-1</sup> | 13.10          | -4.56          | <b>141.39</b>  | <b>135.86</b>  | -17.74         | 28.22          | n.d.           | 3.17          |
| %cyano/tot  | cell L <sup>-1</sup>            | <b>-368.92</b> | <b>-128.10</b> | <b>-428.77</b> | <b>-939.19</b> | <b>-209.15</b> | <b>-317.92</b> | <b>-152.15</b> | <b>-57.90</b> |
|             | cell+fil L <sup>-1</sup>        | 24.02          | <b>35.53</b>   | <b>37.34</b>   | 10.85          | 25.18          | 16.67          | 6.10           | <b>5.58</b>   |
|             | mm <sup>3</sup> L <sup>-1</sup> | <b>-107.30</b> | -19.15         | <b>-118.44</b> | <b>-306.66</b> | <b>-53.13</b>  | <b>-95.15</b>  | <b>-46.79</b>  | <b>-15.64</b> |
| %brown/tot  | cell L <sup>-1</sup>            | 7.17           | 11.60          | n.d.           | <b>126.19</b>  | <b>55.51</b>   | n.d.           | n.d.           | <b>4.71</b>   |
|             | cell+fil L <sup>-1</sup>        | 2.72           | 8.38           | n.d.           | <b>86.93</b>   | <b>44.96</b>   | n.d.           | n.d.           | 2.62          |
|             | mm <sup>3</sup> L <sup>-1</sup> | 6.35           | 11.00          | n.d.           | <b>118.94</b>  | <b>53.56</b>   | n.d.           | n.d.           | <b>4.33</b>   |
| %p.rub/tot  | cell L <sup>-1</sup>            | 10.78          | 1.99           | <b>72.16</b>   | n.d.           | 1.00           | 12.87          | n.d.           | 3.64          |
|             | cell+fil L <sup>-1</sup>        | 10.78          | 1.99           | <b>72.16</b>   | n.d.           | 1.00           | 12.87          | n.d.           | 3.64          |
|             | mm <sup>3</sup> L <sup>-1</sup> | 10.78          | 1.99           | <b>72.16</b>   | n.d.           | 1.00           | 12.87          | n.d.           | 3.64          |
